# Supplementary material for: Detecting activity locations from raw GPS data: a novel kernel-based algorithm
Source: Springer Nature journal article supplement (doi:10.1186/1476-072x-12-14), 2013-03-16
Supplement: 12942_2012_537_MOESM2_ESM.pdf [file 12942_2012_537_MOESM2_ESM.pdf]

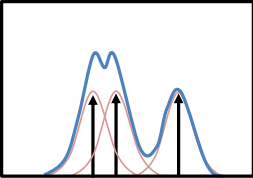

↑ Event

Kernel function

Resulting density estimation
